# Supplementary material
Source: MDPI journal article supplement (https://www.mdpi.com/2673-6284/12/2/39)
Supplement: s1 [file s1]

**Table S1.** Main classes of common metabolites to *L.fermentum* U-21 and *L.fermentum* 279 detected in the aqueous phase of culture supernatant.

| Metabolite                               | Class                       |
|------------------------------------------|-----------------------------|
| Glycine (Gly)                            | Amino acids and derivatives |
| Alanine (Ala)                            |                             |
| Valine (Val)                             |                             |
| Leucine (Leu)                            |                             |
| Isoleucine (Ile)                         |                             |
| Aspartic acid (Asp)                      |                             |
| Asparagine (Asn)                         |                             |
| Glutamic acid (Glu)                      |                             |
| Glutamine (Gln)                          |                             |
| Serine (Ser)                             |                             |
| Threonine (Thr)                          |                             |
| Methionine (Met)                         |                             |
| Lysine (Lys)                             |                             |
| Histidine (His)                          |                             |
| Proline (Pro)                            |                             |
| Phenylalanine (Phe)                      |                             |
| Tyrosine (Tyr)                           |                             |
| Tryptophan (Trp)                         |                             |
| 2-Aminocaprylic acid                     |                             |
| Norleucine                               |                             |
| Homocysteine                             |                             |
| Homoserine                               |                             |
| Norvaline                                |                             |
| Ornithine                                |                             |
| N-Methyl- $\alpha$ -aminoisobutyric acid |                             |
| $\beta$ -Alanine                         |                             |
| 5-Hydroxytryptophan                      |                             |
| Pyroglutamic acid                        |                             |
| Aceturic acid                            |                             |
| $\alpha$ -Methyl-L-tyrosine              |                             |
| N,N-Dimethylglycine                      |                             |
| N-Acetyl-L-glutamic acid                 |                             |
| Carnitine                                |                             |
| Propanoic acid                           | Organic acid                |
| Cinnamic acid                            |                             |
| Succinic acid                            |                             |
| Fumaric acid                             |                             |
| Formic acid                              |                             |
| Maleic acid                              |                             |
| Malonic acid                             |                             |
| Phthalic acid                            |                             |
| Propanedioic acid                        |                             |
| Oxalic acid                              |                             |
| 2-Aminobutanoic acid                     |                             |
| 2-Hydroxybutyric acid                    |                             |
| 3-Hydroxybutyric acid                    |                             |
| Glycolic acid                            |                             |
| Lactic Acid                              |                             |
| Tartaric acid                            |                             |

|                          |                           |
|--------------------------|---------------------------|
| Methylcitric acid        |                           |
| Maltose                  |                           |
| Melibiose                |                           |
| Mannobiose               |                           |
| Cellobiose               |                           |
| Lactose                  |                           |
| Turanose                 |                           |
| Erythrose                |                           |
| Xylose                   |                           |
| Galactose                |                           |
| Glucose                  |                           |
| Mannose                  |                           |
| Tagatose                 |                           |
| Fructose                 |                           |
| 2-Keto-gluconic acid     |                           |
| Gluconic acid            |                           |
| Mannonic acid            | Saccharides               |
| Ribonic acid             |                           |
| Xylonic acid             |                           |
| D-Erythro-Pentitol       |                           |
| Mannitol                 |                           |
| Glycerol                 |                           |
| meso-Erythritol          |                           |
| Arabinitol               |                           |
| Erythritol               |                           |
| <u>Arabitol</u>          |                           |
| Arabinofuranose          |                           |
| Dihydroxyacetone         |                           |
| Levoglucozan             |                           |
| Myo-Inositol             |                           |
| Trehalose-6-phosphate    |                           |
| Mannopyranose            |                           |
| 2-Hydroxyisocaproic acid |                           |
| 4-Hydroxybutanoic acid   | Fatty acids and analogues |
| Butanoic acid            |                           |

**Table S2.** Main classes of shared metabolites of *L.fermentum* U-21 and *L.fermentum* 279 detected in the lipid-containing phase of culture supernatant.

| Metabolite                    | Class                       |
|-------------------------------|-----------------------------|
| Alanine (Ala)                 |                             |
| Asparagine (Asn)              |                             |
| Proline (Pro)                 |                             |
| Tryptophan (Trp)              | Amino acids and derivatives |
| 1-Aminocyclopentanecarboxylic |                             |
| Pyroglutamic acid             |                             |
| Oxalic acid                   |                             |
| Phthalic acid                 |                             |
| Ritalinic acid                | Organic acids               |
| 4-Hydroxybenzoic acid         |                             |
| Lyxose                        | Saccharides                 |
| Heptadecanoic acid            |                             |
| Undecanoic acid               | Fatty acids and analogues   |
| Butanoic acid                 |                             |

---



---

Oleic acid

---

**Table S3.** Main classes of *L.fermentum* 279 metabolites detected in the aqueous phase of culture supernatant.

| Metabolite <sup>1</sup>                       | Class                       |
|-----------------------------------------------|-----------------------------|
| Glycine (Gly)                                 | Amino acids and derivatives |
| Alanine (Ala)                                 |                             |
| Valine (Val)                                  |                             |
| Leucine (Leu)                                 |                             |
| Isoleucine (Ile)                              |                             |
| Aspartic acid (Asp)                           |                             |
| Asparagine (Asn)                              |                             |
| Glutamic acid (Glu)                           |                             |
| Glutamine (Gln)                               |                             |
| Serine (Ser)                                  |                             |
| Threonine (Thr)                               |                             |
| Methionine (Met)                              |                             |
| Lysine (Lys)                                  |                             |
| Histidine (His)                               |                             |
| Proline (Pro)                                 |                             |
| Phenylalanine (Phe)                           |                             |
| Tyrosine (Tyr)                                |                             |
| Tryptophan (Trp)                              |                             |
| 2-Aminocaprylic acid                          |                             |
| <u>5-Aminovaleric acid</u>                    |                             |
| <u>6-Aminocaproic acid</u>                    |                             |
| <u>Cystathionine</u>                          |                             |
| <u>7-Azatryptophan</u>                        |                             |
| Norleucine                                    |                             |
| Homocysteine                                  |                             |
| Homoserine                                    |                             |
| Norvaline                                     |                             |
| Ornithine                                     |                             |
| N-Methyl- $\alpha$ -aminoisobutyric acid      |                             |
| $\beta$ -Alanine                              |                             |
| 5-Hydroxytryptophan                           |                             |
| Pyroglutamic acid                             |                             |
| Aceturic acid                                 |                             |
| $\alpha$ -Methyl-L-tyrosine                   |                             |
| N,N-Dimethylglycine                           |                             |
| N-Acetyl-L-glutamic acid                      |                             |
| <u>N-<math>\alpha</math>-Acetyl-L-Lysine</u>  |                             |
| <u>N-Methyl-L-glutamic acid</u>               |                             |
| <u>N-methyltryptophan</u>                     |                             |
| <u>Tranexamic acid</u>                        |                             |
| Carnitine                                     |                             |
| <u>Aconitic acid</u>                          |                             |
| <u>Acrylic acid</u>                           |                             |
| <u>Citric acid</u>                            |                             |
| <u>Ethylphosphonic acid</u>                   | Organic acid                |
| <u><math>\beta</math>-Hydroxypyruvic acid</u> |                             |
| Propanoic acid                                |                             |
| Cinnamic acid                                 |                             |
| Succinic acid                                 |                             |

---

---

Formic acid  
Fumaric acid  
Maleic acid  
Malonic acid  
Phthalic acid  
Propanedioic acid  
Oxalic acid  
2-Aminobutanoic acid  
2-Hydroxybutyric acid  
3-Hydroxybutyric acid  
Glycolic acid  
Lactic Acid  
Tartaric acid  
Methylcitric acid  
Malic acid  
Allofuranose  
Allose  
Arabinose  
Maltose  
Melibiose  
Mannobiose  
Cellobiose  
Lactose  
Turanose  
Erythrose  
Xylose  
Galactose  
Glucose  
Mannose  
Tagatose  
Fructose  
Rhamnose  
Tagatofuranose  
Talofuranose  
D-Trehalose  
Sucrose  
2-Keto-gluconic acid  
Gluconic acid  
Mannonic acid  
Ribonic acid  
Xylonic acid  
Glyceraldehyde  
Galactopyranose  
Galactose oxime  
Glucopyranose  
β-D-Galactofuranose  
D-Glucitol  
Dulcitol  
Xylitol  
D-Erythro-Pentitol  
Mannitol  
Glycerol  
meso-Erythritol

---

Saccharides

|                           |                           |
|---------------------------|---------------------------|
| Arabinitol                |                           |
| Erythritol                |                           |
| <u>Arabitol</u>           |                           |
| Arabinofuranose           |                           |
| Dihydroxyacetone          |                           |
| Levogluconan              |                           |
| Myo-Inositol              |                           |
| Trehalose-6-phosphate     |                           |
| Mannopyranose             |                           |
| <u>Methyl galactoside</u> |                           |
| 2-Hydroxyisocaproic acid  |                           |
| 4-Hydroxybutanoic acid    |                           |
| Butanoic acid             | Fatty acids and analogues |
| <u>Decanoic acid</u>      |                           |
| <u>Tiglic acid</u>        |                           |

<sup>1</sup>Underline metabolites are unique for *L. fermentum* 279

**Table S4.** Main classes of *L.fermentum* 279 metabolite detected in the lipid-containing phase of culture supernatant.

| Metabolite                    | Class                       |
|-------------------------------|-----------------------------|
| Alanine (Ala)                 |                             |
| Asparagine (Asn)              |                             |
| Proline (Pro)                 |                             |
| Histidine (His)               |                             |
| Tryptophan (Trp)              | Amino acids and derivatives |
| 1-Aminocyclopentanecarboxylic |                             |
| Pyroglutamic acid             |                             |
| <u>L-Norleucine</u>           |                             |
| <u>Cinnamic acid</u>          |                             |
| Oxalic acid                   |                             |
| Phthalic acid                 |                             |
| Ritalinic acid                | Organic acids               |
| 4-Hydroxybenzoic acid         |                             |
| <u>Toluic acid</u>            |                             |
| <u>L-Sorbofuranose</u>        |                             |
| <u>β-Arabinopyranose</u>      | Saccharides                 |
| Lyxose                        |                             |
| <u>Arachidic acid</u>         |                             |
| Butanoic acid                 |                             |
| <u>Pentadecanoic acid</u>     |                             |
| <u>Propanoic acid</u>         |                             |
| <u>Hexanoic acid</u>          | Fatty acids and analogues   |
| Heptadecanoic acid            |                             |
| Undecanoic acid               |                             |
| Oleic acid                    |                             |

**Table S5.** All shared metabolites of *L.fermentum* U-21 and *L.fermentum* 279 detected in the extracellular vesicles.

| Metabolite          | Class                       |
|---------------------|-----------------------------|
| Tryptophan (Trp)    |                             |
| Phenylalanine (Phe) |                             |
| Alanine (Ala)       | Amino acids and derivatives |
| Proline (Pro)       |                             |

---

|                                 |              |
|---------------------------------|--------------|
| Valine (Val)                    |              |
| Aspartic acid (Asp)             |              |
| Asparagine (Asn)                |              |
| 3-Amino-2-piperidone            |              |
| 3-Methylpiperazine-2,5-dione    |              |
| Amino levulinic acid            |              |
| Norleucine                      |              |
| L-2-Aminobutyric acid           |              |
| N-Methyl-a-aminoisobutyric acid |              |
| Pyroglutamic acid               |              |
| Penicillamine                   |              |
| Pyrrolidine-2-carboxamide       |              |
| Timonacic                       |              |
| Tranexamic acid                 |              |
| l-Norvaline                     |              |
| 2-Aminocaprylic acid            |              |
| Creatinine                      |              |
| 7-Azatryptophan                 |              |
| Etidocaine                      |              |
| Octadecanamide                  |              |
| Oleamide                        |              |
| Mercaptoacetic acid             |              |
| Methoxyacetic acid              |              |
| Glutarate                       |              |
| Benzeneethanamine               |              |
| Acetic anhydride                | Organic acid |
| Fumaric acid                    |              |
| Pyrrole-2,5-dicarboxylic acid   |              |
| Succinic acid                   |              |
| Pyrrole-2-carboxylic acid       |              |
| Citric acid                     |              |
| Tricarballic acid               |              |
| Glucosamine                     |              |
| Ribono-1,4-lactone              |              |
| Fucose                          |              |
| 3- $\alpha$ -Mannobiose         |              |
| Lactose                         |              |
| Turanose                        |              |
| Xylopyranose                    |              |
| Galactose                       |              |
| Lyxose                          |              |
| Glucose                         | Saccharides  |
| Erythrose                       |              |
| Gulose                          |              |
| Rhamnose                        |              |
| Glyceraldehyde                  |              |
| Arabinonic acid                 |              |
| Gluconic acid                   |              |
| Erythro-Pentitol                |              |
| 1-Deoxypentitol                 |              |
| Pentitol                        |              |
| Erythritol                      |              |
| Maltitol                        |              |

---

|                                                                                               |                           |
|-----------------------------------------------------------------------------------------------|---------------------------|
| Levogluconan                                                                                  |                           |
| Furan                                                                                         |                           |
| 2-Hydroxyisocaproic acid                                                                      |                           |
| 6-Aminocaproic acid                                                                           |                           |
| Itaconic acid                                                                                 |                           |
| 2-Hydroxy-3-methylbutyric acid                                                                |                           |
| 4-Pentenoic acid                                                                              |                           |
| 1-Decanol                                                                                     |                           |
| 2-Undecen-4-ol                                                                                |                           |
| Dodecanamide                                                                                  | Fatty acids and analogues |
| (Z)-Docos-13-enamide                                                                          |                           |
| Hexanoic acid                                                                                 |                           |
| Propanoic acid                                                                                |                           |
| Erucic acid                                                                                   |                           |
| Pentanamide                                                                                   |                           |
| Glycylglycine                                                                                 |                           |
| Valylvaline                                                                                   |                           |
| 1-(benzo[d][1,3]dioxol-5-yl)-2-(4-methylpiperidin-1-yl)pentan-1-one                           |                           |
| 1,2,4-Butanetriol                                                                             |                           |
| 1,2-Bis(4-methoxyphenyl)ethane-1,2-diamine                                                    |                           |
| 1,3-Cyclohexanebis(methylamine)                                                               |                           |
| 1,3-Dioxolane                                                                                 |                           |
| 1,3-Propanediol                                                                               |                           |
| 1,2,3-Butanetriol                                                                             |                           |
| 1,2-Benzenediol                                                                               |                           |
| (R)-(-)-2-Pyrrolidinemethanol                                                                 |                           |
| 1,3-bis[(Trimethylsilyl)ethynyl]benzene                                                       |                           |
| 1,3-Dioxolane                                                                                 |                           |
| 1,3-Dioxolane-2-methanol                                                                      |                           |
| 1,4-Bis[2-[N-[6-methoxy-8-quinolyl]amino]propionyl]piperazine                                 |                           |
| 1,4-diazabicyclo[4.3.0]nonan-2,5-dione                                                        |                           |
| 1,6-Bis(trimethylsilyl)-1,3,5-hexatriyne                                                      |                           |
| 1-[2,4-Bis(trimethylsiloxy)phenyl]-2-[(4-trimethylsiloxy)phenyl]propan-1-one                  |                           |
| 17a-Aza-D-homoandrostan-17-one                                                                |                           |
| 1-butanamine                                                                                  | Other organic compound    |
| 1-Cyclohexyldimethylsilyloxy-4-methylpentane                                                  |                           |
| 1-Dichloromethyl(dimethyl)silyloxyoctadecane                                                  |                           |
| Carbonic acid                                                                                 |                           |
| Disulfide                                                                                     |                           |
| 1-Isobutylsulfanylmethyl-2,8,9-trioxa-5-aza-1-sila-bicyclo[3.3.3]undecane                     |                           |
| 2-(1-Amino-2-1H-imidazol-1-ylethyl)-4-amino-6-dimethylamino-S-triazine                        |                           |
| 2-(2,5-Dimethoxyphenyl)-7-methoxy-2,4,6-cycloheptatrien-1-one                                 |                           |
| 2-(2-Benzyldecahydroisoquinolin-3-yl)ethanol                                                  |                           |
| 2-(4'-Methoxyphenyl)-2-(3'-methyl-4'methoxyphenyl)propane                                     |                           |
| 2-(4-Methyl-1,3-thiazol-5-yl)ethanamine                                                       |                           |
| 2,3,4-Trimethoxymandelic acid                                                                 |                           |
| 2,4,4-Trimethyl-1-pentanol                                                                    |                           |
| 2,4-Pentadienenitrile                                                                         |                           |
| 2-[[2-[Dimethylamino]propyl]amino]-4-[trichloromethyl]-6-[a,a,a-trichloro-p-tolyl]-S-triazine |                           |

---

2-[2-[2-Methoxyethoxy]ethoxy-1,3-dioxalane  
2-Cyano-5-(4-fluorophenyl)pyrimidine  
2-Ethyl-3-ketovalerate  
2--Fluorobenzylamine  
2-Morpholinomethyl-1,3-diphenyl-2-propanol  
2-Propanone  
2-t-Butyl-5-methyl-[1,3]dioxolane-4-carboxylic acid  
2-Undecanethiol  
3,5-Di(2-thienyl)pyridine  
3,6-Dioxa-2,4,5,7-tetrasilaoctane  
3-Ethylpentan-3-ol  
3-Hydroxymethyl-2-trimethylsilyloxypentane  
4-((5-Ethenyl-1-azabicyclo(2,2,2)octan-2-yl)oxymethyl)-6-methoxy-  
quinoline  
4,4'-Bitriazolyl  
4-Benzyl-1-(1-methyl-2-[(trimethylsilyl)oxy]-2-{4-  
[(trimethylsilyl)oxy]phenyl}ethyl)piperidine  
4H-1,2,4-Triazol-4-amine  
4-Hydroxy-5-methyl-1-(tetrahydrofuran-2-yl)pyrimidin-2(1H)-one  
4-Pyrimidinamine  
5a-Pregnane-3beta,20a-diamine  
5F-PB-22  
5-Hydroxy-2-methylpyridine  
8-(4-Hydroxyphenyl)-1-methyl-3H,6H,7H-imidazo[1,2-g]purine-2,4-  
dione  
8-Heptadecene  
Benzenamine  
Benzo[1,2-c:3,4-c':5,6-c'']tris[1,2,5]oxadiazole  
Disilane  
Ethyl pipercolinate  
Methyl (2R,3R,4S)-3-(tert-butyl dimethylsilyloxy)-2,4-  
dimethylhexanoate  
Methyl (Z)-10-pentadecenoate  
Methyl 2,2-dimethyl-3,6,9,12,15-pentaoxa-2-silaheptadecan-17-oate  
Methyl 2-hydroxy-4-methyl-4-nitroso-pentanoate  
Methylmalonic monoamide  
N(1)-[4-[4-Methoxyphenyl]-6-[trichloromethyl]-2-pyrimidinyl]-  
N(2),N(2)-  
N,N-Diethylheptylamine  
N-Acetyl-veratramine  
N-Dimethylaminomethyl-tert.-butyl-isopropylphosphine  
N-Ethyldiethanolamine  
Ortetamine  
Tetratetracontane  
Trifluoroacetamide  
(1-Benzyl-3-phenyl-prop-2-ynyl)-dimethyl-amine  
(S)-(+)-2-Pyrrolidinemethanol  
(Z)-Methyl hexadec-11-enoate  
[2-Pyrrolidinyl]methylamine  
1,2,4,5-Tetrazine, 3,6-diphenyl-  
1,2-Bis(1,4,7-trioxa-10-azacyclododec-10-yl)-ethane  
1-Cyclohexyldimethylsilyloxy-2-phenylethane  
1-Cyclohexylethanol

---



---

1-Phenyl-2-(2-trimethylsilylcyclopropen-1-yl)ethanol  
 2,2,6,6-Tetramethyl-2,6-disilapiperidine  
 2,3,4-Trifluorobenzoic acid  
 2,5-Dimethoxy-4-nitrophenethylamine  
 2,6,10-Trimethyltridecane  
 2-[[2-[Dimethylamino]propyl]amino-4-[trichloromethyl]-6-[a,a,a-trichloro-m-tolyl]-S-triazine  
 2-Methyl-2-(trimethylsilyloxy)-1-(4-(2-(trimethylsilyloxy)ethoxy)phenyl)propan-1-one  
 2-Methyl-8-hydroxyquinoline  
 2-Pentamethyldisilanyloxybutane  
 2-Phenyl-1,3-oxazol-2-ine  
 3,8-Dioxa-2,9-disiladecane  
 3H-1,2,4-Triazol-3-one, 1,2-dihydro-  
 3-Methoxyhex-1-ene  
 3-Methyl-1,3-bis(trimethylsilyloxy)butane  
 3-Propionyloxytridecane  
 3-Trimethylsilylmethyl-4-hydroxy-2-methyl-1-hexene  
 4-Ethyl-4-methyl-1-hexene  
 4-methoxy-N,N-Dimethylcathinone  
 5-fluoro PB-22 N-(2-fluoropentyl) isomer  
 9-Acetylhydrazono-3,6-dichloro-2,7-bis-[2-(diethylamino)ethoxy]fluorene  
 Benzimidazo[2,1-a]isoquinoline  
 Bromosuccinic acid  
 Desethylterbutylazine  
 Ether  
 Etonitazene  
 Methyl 2-hydroxy-2-(4-hydroxyphenyl)propanoate  
 Metoprolol  
 N,O-Bis(tert-butyltrimethylsilyl)carbamate  
 N-[beta-Hydroxy-beta-[4-[1-adamantyl-6,8-dichloro]quinolyl]ethyl]piperidine  
 N-Benzhydrylidene-1-(2,4,6-trimethylphenyl)ethylamine N-oxide  
 N-Ethylformamide  
 Propanamide  
 Propanolol  
 Spiro[bicyclo[2.2.1]heptane-2,2'-[1,3]dioxolane]-3-one  
 Tolycaine  
 Trimethylsilyl 3-(3-chloro-4-[(trimethylsilyl)oxy]phenyl)-2-[(trimethylsilyl)amino]propanoate  
 Tris(trimethylsilyl)carbamate  
 (±)-N-Ethylcathinone ephedrine  
 (5-methoxyindol-3-yl)-N,N-diisopropyl-glyoxylamide  
 (Methoxymethyl)trimethylsilane  
 (Z)-5-Methoxy-3,5-dimethyl-2-hexenyltrimethylsilane  
 1-(2-(3-Cyclohexenyl)ethyl)silatrane  
 1-(2-Methoxyethoxy)-2-methyl-2-propanol  
 1-(3,4-Methylenedioxyphenyl)-2-methylamino-1-butanone  
 1-(3-Methylbutyl)-2,3,4,6-tetramethylbenzene  
 3-Furoic acid  
 2-Propenoic acid  
 Scyllo-Inositol

---

---

2-Butyne-1,4-diol  
5-Octadecene  
Eicosane  
3-Hexadecene  
Ethane  
Nonane  
Heptane  
Decane  
Benzoin  
3-Methylpiperazine-2,5-dione  
Benzene  
4-Hydroxybenzoic acid  
1-Naphthylamine  
Phenanthrene  
Flecainide  
Phthalic acid  
Dibutyl phthalate  
Benzyl thiocyanate  
Butylone  
Pentylone  
1-Butanone  
2,4-Pentanedione  
4-Methylethcathinone  
2-Butanone  
2-Cyclohexen-1-one  
Octadecanamide  
Oleamide  
Cloricromen  
Cyclohexane  
Cyclopropane  
Cyclopropene  
Cyclohexanamine  
Mevalonolactone  
Triethylene glycol  
2(3H)-Furanone  
2-Furoic Acid  
Boron  
1,3-Butadiyne  
Melatonin  
indole-3-acetamide 3  
Phthalimide  
Isoquinolinium  
4-(2-Aminoethyl)-2-methoxyphenol  
Adrenaline  
Butalamine  
1-Hexanamine  
3-Amino-2,4-dimethylpentane  
Diisopropylamine  
Isopropylamine, N-trimethylsilyl-  
spermidine  
Ethylamine  
Terbutaline  
(R)-(-)-Phenylephrine

---

---

Hydroquinone  
Piperidine  
2-Piperidinone  
5-Hydroxymaltol  
Pyrazine  
Isonicotinic Acid  
Picolinic acid  
2-hydroxypyridine  
Pyridine  
2(1H)-Pyridinone  
Cytosine  
Pyrrole-2-carboxylic acid  
1-Methyl-5-mercaptopotrazole  
Undecene  
1-Heptadecene  
Dodecene  
N,N'-Dimethylurea

---
